# Supplementary material for: A highly stable CuS and CuS–Pt modified Cu2O/CuO heterostructure as an efficient photocathode for the hydrogen evolution reaction
Source: Royal Society of Chemistry journal article supplement (doi:10.1039/c5ta09464j), 2015-12-11
Supplement: c5ta09464j1.pdf [file c5ta09464j1.pdf]

## Supportive information

### A highly stable CuS and CuS--Pt modified Cu<sub>2</sub>O/CuO heterostructure as an efficient photocathode for the hydrogen evolution reaction

Amare Aregahegn Dubale,<sup>1</sup> Andebet Gedamu Tamirat,<sup>1</sup> Hung-Ming Chen,<sup>1</sup> Taame Abraha Berhe,<sup>2</sup> Chun-Jern Pan,<sup>1</sup> Wei-Nien Su<sup>2,\*</sup> and Bing-Joe Hwang<sup>1,3\*</sup>

<sup>1</sup> NanoElectrochemistry Laboratory, Department of Chemical Engineering, National Taiwan University of Science and Technology, Taipei 106, Taiwan.

<sup>2</sup> NanoElectrochemistry Laboratory, Graduate Institute of Applied Science and Technology, National Taiwan University of Science and Technology, Taipei 106, Taiwan.

<sup>3</sup> National Synchrotron Radiation Research Center, Hsinchu 30076, Taiwan.

\* Corresponding authors: [bjh@mail.ntust.edu.tw](mailto:bjh@mail.ntust.edu.tw)

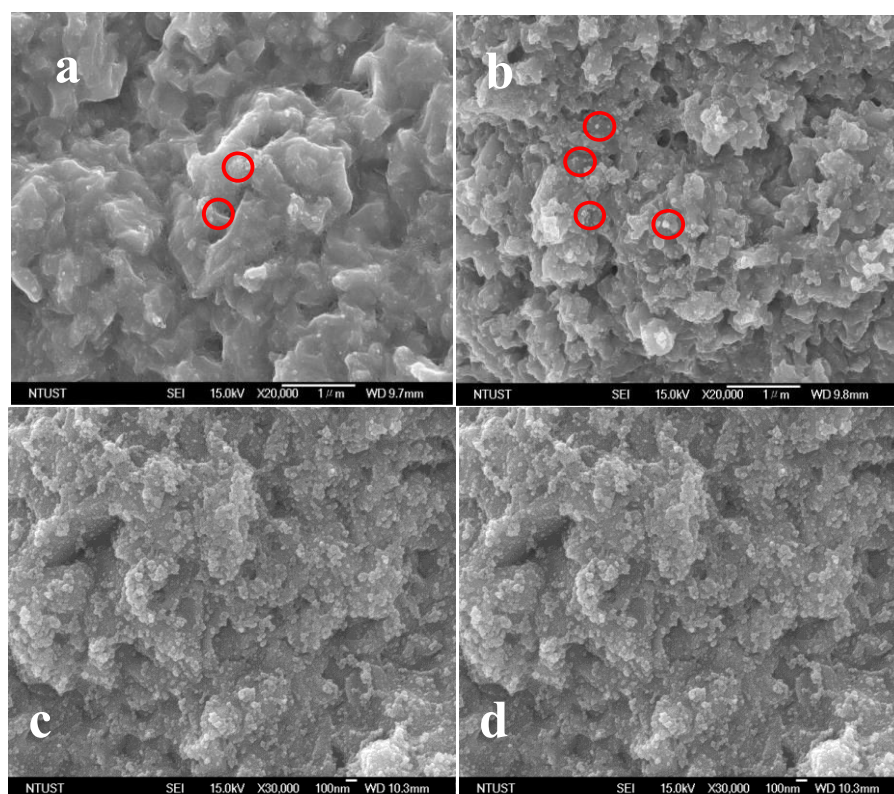

**Figure S1.** Scanning electron microscopy images of 3 (a) and 6 (b). 12 (c) and 15 (d) times SILAR of CuS on Cu<sub>2</sub>O/CuO.

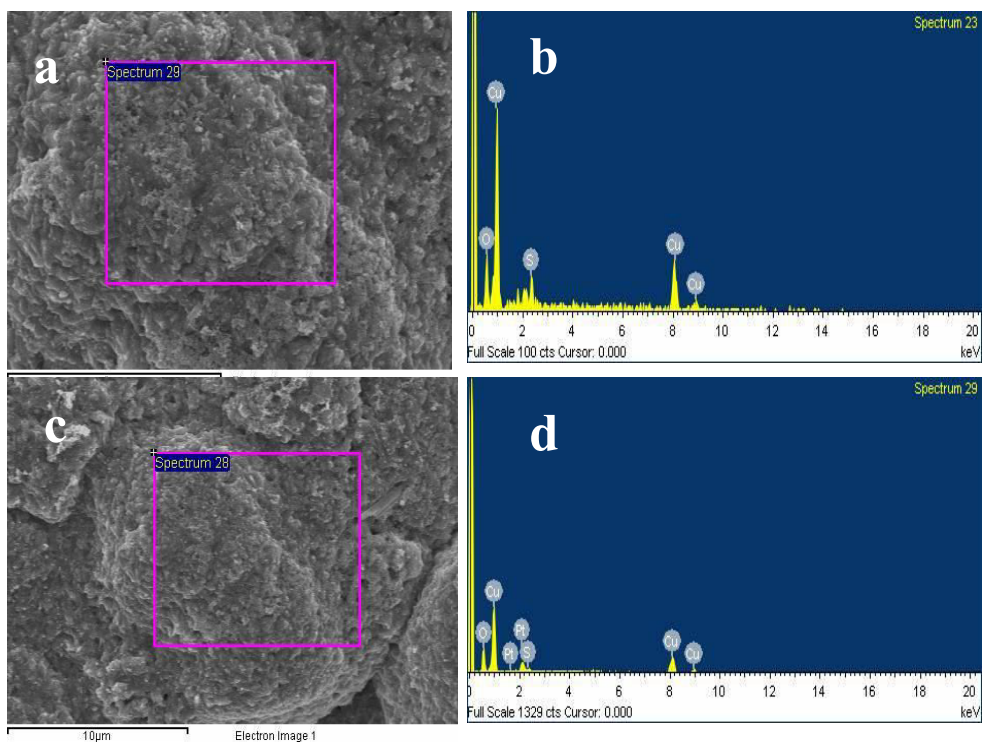

**Figure S2.** SEM images (a and c) and Typical EDX analysis (b and d) acquired from the  $\text{Cu}_2\text{O}/\text{CuO}/\text{CuS-9}$  and  $\text{Cu}_2\text{O}/\text{CuO}/\text{CuS-9}/\text{Pt}$  photocathode film. It can be seen that a weak S peak was detected together with Cu and O from the  $\text{Cu}_2\text{O}/\text{CuO}/\text{CuS-9}$  while both S and Pt was detected from the  $\text{Cu}_2\text{O}/\text{CuO}/\text{CuS-9}/\text{Pt}$ .

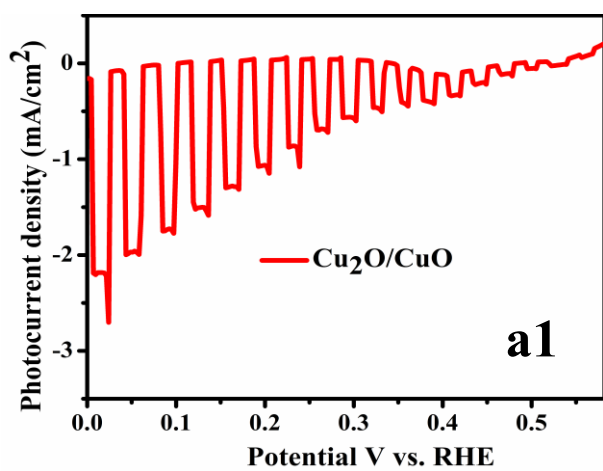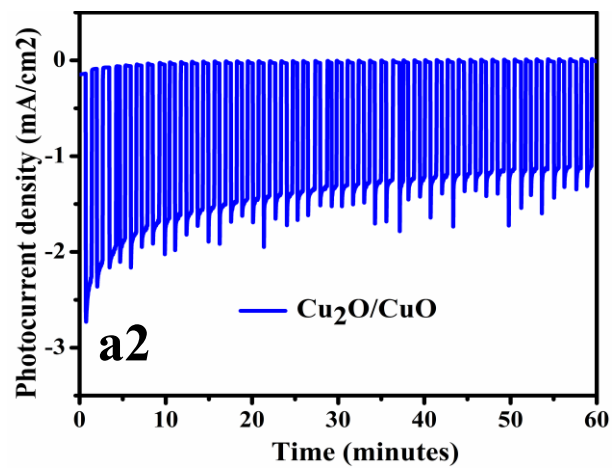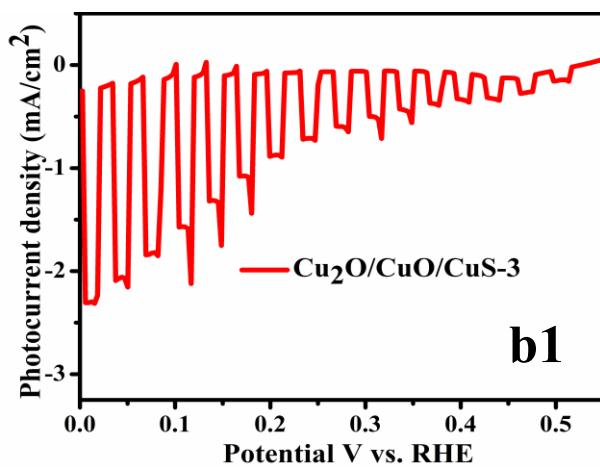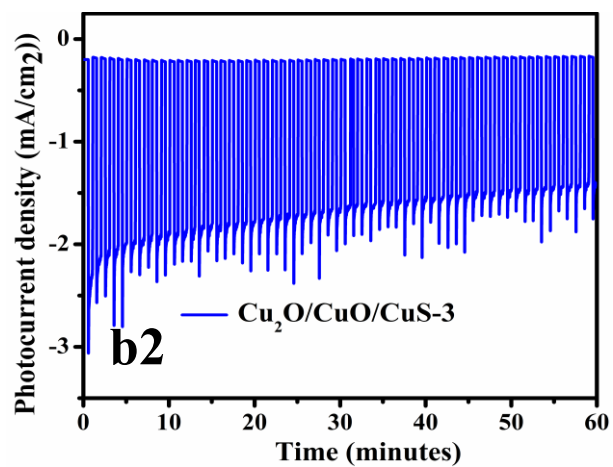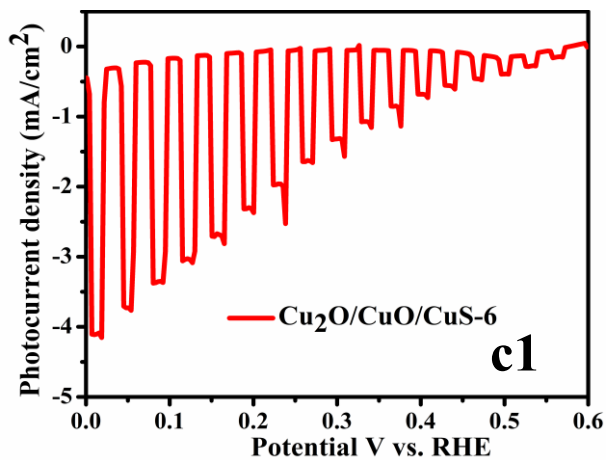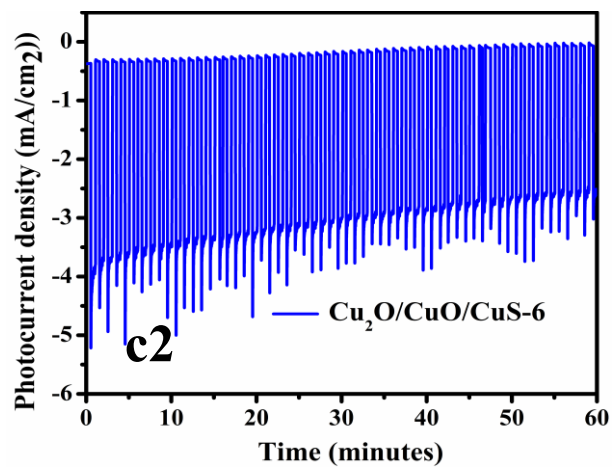

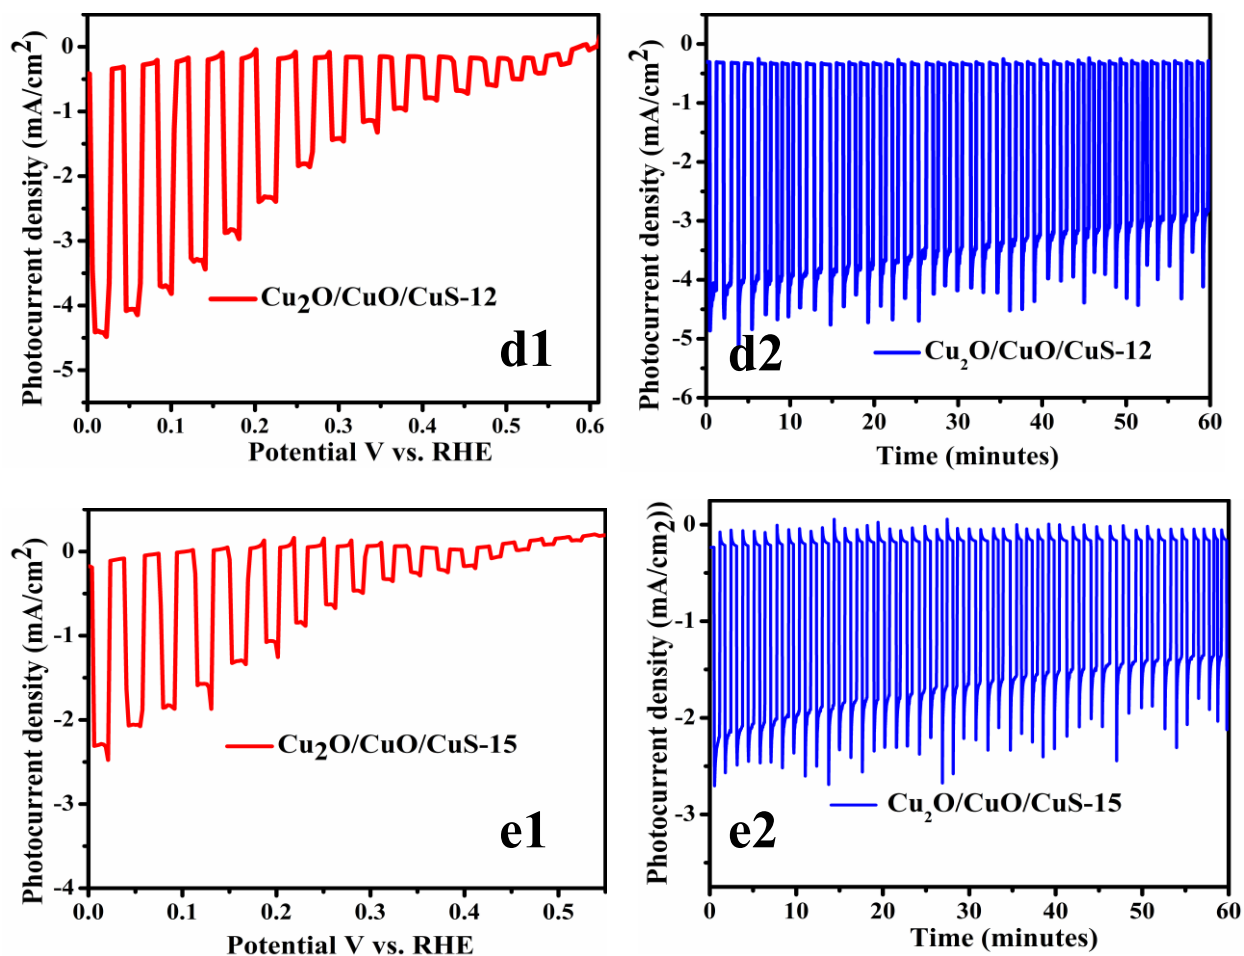

**Figure S3.** PEC performances and stability measurement of bare Cu<sub>2</sub>O/CuO (a1 and a2) Cu<sub>2</sub>O/CuO/CuS-3 (b1 and b2), Cu<sub>2</sub>O/CuO/CuS-6 (c1 and c2), Cu<sub>2</sub>O/CuO/CuS-12 (d1 and d2) and Cu<sub>2</sub>O/CuO/CuS-15 (e1 and e2).

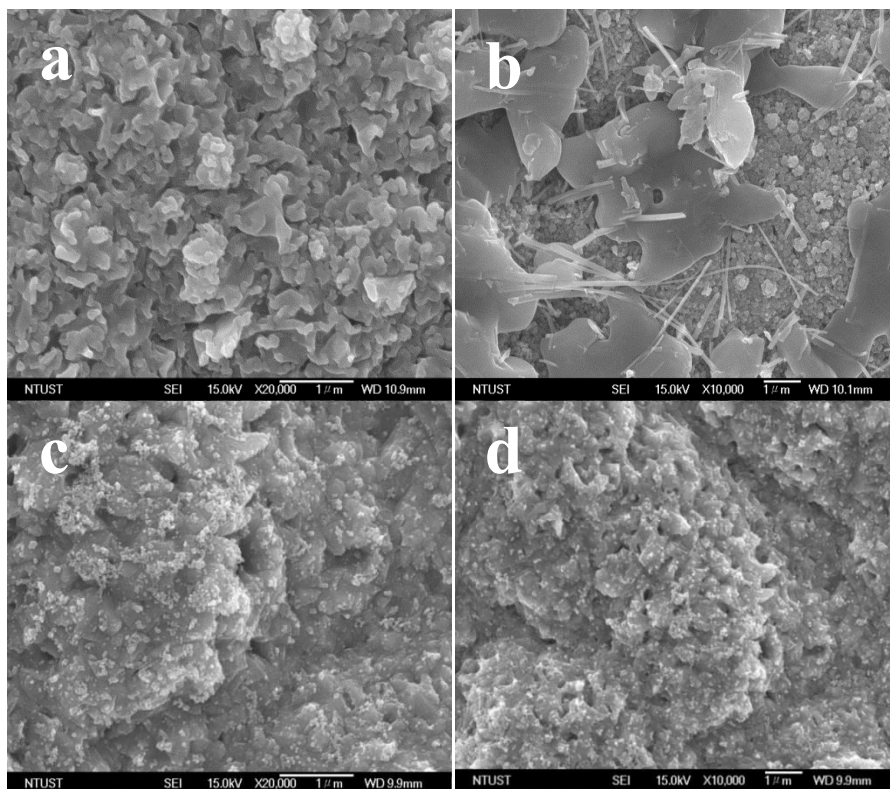

**Figure S4** FE SEM images of  $\text{Cu}_2\text{O}/\text{CuO}$  and  $\text{Cu}_2\text{O}/\text{CuO}/\text{CuS-9}$  before and after 20 minute photo-stability measurement under illumination of AM 1.5 G (a)  $\text{Cu}_2\text{O}/\text{CuO}$  before PEC (b)  $\text{Cu}_2\text{O}/\text{CuO}$  after PEC (c)  $\text{Cu}_2\text{O}/\text{CuO}/\text{CuS-9}$  before PEC and (d)  $\text{Cu}_2\text{O}/\text{CuO}/\text{CuS-9}$  after PEC.
